1  
2  
3  
4  
5  
6  
7  
8  
9  
10  
11  
12  
13  
14  
15  
16  
17  
18  
19  
20  
21  
22  
23  
24

**Cognitive Impairment and Noncommunicable Diseases in Egypt's Aging Population: Insights and Implications from the pilot of the Longitudinal Study of Egyptian Healthy Aging “AL-SEHA”**

**Sara A. Moustafa<sup>1</sup>**

**Reem Deif<sup>1</sup>**

**Nada Gaballah<sup>2</sup>**

**Mohamed Salama<sup>1,3</sup>**

**<sup>1</sup>Institute of Global Health and Human Ecology, The American University in Cairo**

**<sup>2</sup>Department of Computer Sciences, School of Sciences and Engineering, The American University in Cairo**

**<sup>3</sup>Global Brain Health Institute (GBHI), Trinity College Dublin (TCD), Dublin, Ireland**

## KEY MESSAGES

- The increasing prevalence of cognitive impairment among the aging population creates a need for a comprehensive understanding of its implications on the individuals' quality of life
- A significant association between cognitive impairment and non-communicable diseases exists and further research can help in the strategic allocation of resources for designing the most effective interventions

25

26

27

## 28 **Cognitive Impairment and Noncommunicable Diseases in Egypt's Aging Population: Insights and** 29 **Implications from the Pilot of the Longitudinal Study of Egyptian Healthy Aging “AL-SEHA”**

30

### 31 **Abstract**

32 As the global population ages, the prevalence of cognitive impairment among older individuals has been  
33 steadily rising. Egypt, like many countries, is grappling with the challenges posed by an aging  
34 demographic. Cognitive impairment not only affects the quality of life of older adults but also imposes  
35 significant burdens on healthcare systems and societies as a whole. This paper presents findings from the  
36 pilot phase of the Longitudinal Study of Egyptian Healthy Aging, known as "AL-SEHA," shedding light  
37 on the intricate relationship between cognitive impairment and noncommunicable diseases (NCDs) in  
38 Egypt's aging population.

39

### 40 **Introduction**

41 The concept of healthy aging, as advocated by the World Health Organization, emphasizes nurturing  
42 functional ability in older age for an enriched quality of life. This approach integrates intrinsic capacity  
43 (IC) and environmental factors, transitioning elder care from disease-centered to proactive personalized  
44 interventions, notably in hospitalized older adults<sup>1</sup>. The innovative notion of healthy aging encapsulates  
45 the process of nurturing and sustaining functional ability in older age for an enriched quality of life. This  
46 perspective underscores the essence of functional ability, encompassing health-related attributes that  
47 empower older individuals to pursue valued endeavors. It intertwines an individual's (IC), a composite of

48 physical and mental capabilities, with environmental factors, thereby enhancing the potential for a higher  
49 quality of life while reducing societal burdens. Traditional elder care approaches, centered on specific  
50 disease markers, are transitioning towards a longitudinal, proactive model driven by personalized  
51 interventions to amplify intrinsic capacity and functional ability, particularly notable in the context of  
52 hospitalized older adults <sup>1,2</sup>.

53

#### 54 **Assessing Intrinsic Capacity and Predicting Health Outcomes**

55

56 The assessment of IC's indicators predicts health outcomes, particularly functional capability. Domains  
57 such as locomotion, vitality, cognition, psychological, and sensory elements are pivotal for maintaining  
58 IC in older adults <sup>3</sup>. Beard's study <sup>4</sup> corroborates this, identifying five subfactors within the English  
59 Longitudinal Study on Ageing (ELSA) that forecast future functioning. However, a universally accepted  
60 IC index is yet to emerge, warranting further exploration. The significance of assessing IC becomes  
61 evident in its predictive value for health outcomes, specifically concerning functional capability. The  
62 intricate nature of IC indicators raises inquiries about the most pertinent markers for comprehensive  
63 evaluation of an individual's holistic physical and mental condition. Recent Chinese Longitudinal study  
64 CHARLS further substantiates this structural validity through the ELSA approach <sup>5</sup>, collectively  
65 accentuating the predictive potential of IC decline and its domains within aging populations. However, a  
66 universally acknowledged IC index for clinical or research purposes is yet to be established, necessitating  
67 further exploration and quantification of IC concepts in varied contexts.

68

#### 69 **Cognitive Impairment's Impact on Quality of Life**

70 Cognitive impairment's escalating prevalence, especially with age, necessitates a comprehensive  
71 exploration of its implications for individuals' quality of life <sup>6,7</sup>. The escalation in cognitive decline,  
72 particularly with increasing age and life expectancy, mirrors the mounting challenges facing developed  
73 and developing nations. The resultant surge in dementia not only inflicts substantial economic and social  
74 burdens on patients and families but also warrants a comprehensive exploration of its prevalence across  
75 genders and residential areas. Discrepancies within the existing literature concerning the gender and  
76 residential area-based prevalence of cognitive impairment highlight the need for a cohesive understanding  
77 of these dimensions <sup>6,7</sup>.

78

## 79 **Socioeconomic Factors and Cognitive Impairment Risk**

80 Socioeconomic factors intricately interplay with cognitive health, with lower education, job insecurity,  
81 and lifestyle choices influencing susceptibility to cognitive impairments<sup>9</sup>. Notably, individuals with  
82 lower educational attainment, diminished IQ, and tenuous job security exhibit higher susceptibility to  
83 cognitive impairments. Furthermore, lifestyle choices play a pivotal role, with tobacco and alcohol usage  
84 surfacing as significant predictors of cognitive decline. These connections emphasize the multifaceted  
85 nature of cognitive health, woven intricately with socioeconomic dimensions and behavioral patterns.

86

87

## 88 **Noncommunicable Diseases (NCDs) and Cognitive Decline**

89 NCDs, like diabetes and hypertension, impact cognitive faculties, revealing the interconnectedness of  
90 physical and cognitive well-being (World Health Organization, 2016)<sup>10</sup>. NCDs, a formidable presence  
91 within the global health landscape, assume a central role in shaping morbidity and mortality patterns.  
92 Their impact resonates through reduced problem-solving capabilities, compromised verbal proficiency,  
93 and waning numerical comprehension, underscoring the intricate interplay between physical and  
94 cognitive well-being<sup>10</sup>.

95

## 96 **Cognitive Impairment and NCDs in Egypt: Gaps in Literature**

97 As people age, they are more likely to experience chronic non-communicable conditions. Based on the  
98 recommendations of WHO, the National Institute of Aging (NIA), and the Centers for Disease Control  
99 and Prevention

100 (CDC), fighting non-communicable diseases is broadly agreed to be the key to further health gains at an  
101 older age and to making health and social policies sustainable. NCDs, malnutrition, and depression are  
102 common in our elderly population, particularly among women and the under-educated<sup>11</sup>.

103 Aging is often accompanied by cognitive function, memory, and mental health declines. Research on  
104 effective interventions to prevent or delay these declines and improve the quality of life of older adults is  
105 critical<sup>12</sup>. With a prevalence of depression, a sense of isolation, and declined cognitive functions in the  
106 Egyptian elderly<sup>12,13</sup>. In older people, cognitive impairment is a strong predictor of functional disability  
107 and the need for care. Mild cognitive impairment increases the risk of developing dementia, and available  
108 evidence suggests that a five-year delay in the age of onset would reduce dementia prevalence by half<sup>14</sup>

109 .<sup>15,16</sup>. There is limited data on mental health and cognitive functions in the Arab world, and specifically in  
110 Egypt where data are specific to certain areas or specific clinical populations rather than those derived  
111 from large nationwide studies. With this age group expected to grow by 2050, the consequences of  
112 dementia will grow as well.

113 Existing research often focuses on cognitive impairment within NCDs, leaving a gap in understanding  
114 cognitive health among the elderly holistically. Extant investigations into cognitive impairment have  
115 predominantly focused on individuals afflicted by NCDs, imparting a limited scope to understanding the  
116 broader landscape of cognitive health among the elderly. Prior research has, in various instances,  
117 examined the intersection of cognitive issues and NCDs, potentially excluding a more holistic  
118 comprehension of cognitive health among the elderly population. Addressing this void, our study  
119 endeavors to illuminate the prevalence of cognitive impairment within Egypt's older demographic,  
120 specifically those grappling with chronic diseases.

121

## 122 **Investigating Cognitive Impairment Among Egypt's Older Population**

123

### 124 **Methods**

125 Preliminary results of the pilot phase of the Egyptian Longitudinal Study for Aging (AL-SEHA), an HRS  
126 sister study adopting the SHARE questionnaire presented in Table 3, offer insights into Egypt's aging  
127 demographic. The pilot study includes respondents aged 50 and above, with a sample size of 299  
128 participants. The results reflect a diversity of conditions, with varying percentages of cognitive  
129 impairment across diseases. Responding to this need, an Egyptian aging study modeled after the Health  
130 and Retirement Survey (HRS) network studies is being launched. Our findings are based on the AL-  
131 SEHA questionnaire, which adapted the SHARE survey, targeting noninstitutionalized individuals aged  
132 50 and above<sup>17</sup>. This encompassing longitudinal survey included all those above 50 within chosen  
133 households.

134 The studies involving human participants were reviewed and approved by IRB of the American  
135 University in Cairo (IRB-AUC). The patients/participants provided their written informed consent to  
136 participate in this study. The current work has been approved by the IRB of the American University in  
137 Cairo. IRBAUC\_ Case# 2021-2022-029

138

139 **Research design**

140 The study used a cross-sectional design, assessing both dependent and independent variables  
141 simultaneously. Findings were based on a questionnaire from the Longitudinal Study of Egyptian Healthy  
142 Aging (AL-SEHA), adapted from the European Survey of Health, Ageing, and Retirement (SHARE).  
143 Interviews included individuals aged 50 and above, as well as eligible partners living in the same  
144 household. Some questionnaire modules were not given to all household respondents, and interview order  
145 within couples was random.

146 **Inclusion criteria**

147 The study included individuals who could communicate and lived independently at home, in rented  
148 accommodation, hostels, or retirement homes. Those with severe psychiatric issues were excluded. The  
149 sample size was 299 participants, selected through a non-probability convenience sampling technique  
150 based on the eligibility criteria.

151 **Fieldwork**

152 Investigators from five universities were trained to collect data using an Arabic-translated SHARE form.  
153 A sample of eligible elderly individuals was chosen, and home visits were conducted to interview 15  
154 participants per investigator. Data collection took about a month and was uploaded to the American  
155 University in Cairo's Social Research Centre's internet server.

156 **Demographic factors**

157 AL-SEHA data set contains detailed data on demographics. Summary statistics of all demographic  
158 variables used in the analyses can be found in Table 1.

159 **Table 1. Demographics**

|                               | N   | %     |
|-------------------------------|-----|-------|
| <b>Gender</b>                 |     |       |
| Male                          | 128 | 42.81 |
| Female                        | 171 | 57.19 |
| <b>Educational Attainment</b> |     |       |
| No education                  | 48  | 16.05 |

|                       |     |       |
|-----------------------|-----|-------|
| Primary education     | 31  | 10.37 |
| Preparatory education | 18  | 6.02  |
| High school           | 48  | 16.05 |
| Medium high           | 18  | 6.02  |
| Bachelor              | 112 | 37.46 |
| Post grad             | 24  | 8.03  |
| <b>Age</b>            |     |       |
| 50-60                 | 151 | 50.5  |
| 60-70                 | 88  | 29.43 |
| 70-80                 | 50  | 16.72 |
| 80-90                 | 8   | 2.68  |
| Above 90              | 2   | 0.67  |
| <b>Marital Status</b> |     |       |
| Unmarried             | 5   | 1.67  |
| Engaged               | 0   | 0     |
| Married               | 190 | 63.55 |
| Separated             | 3   | 1     |
| Divorced              | 13  | 4.35  |
| Widow                 | 88  | 29.43 |

160

### 161 **Cognitive function**

162 The data were extracted from the SPSS (Version 25) dataset for statistical analysis. Bivariate analyses  
163 included chi-square tests. As appropriate, data were compared using independent t-tests, presented in  
164 Table 2.

165

166

167

168

169 **Table 2. Cognitive functions**

|                       | Impaired (n=118) |       | Unimpaired (n=181) |       | Chi Squared Test | p-value       |
|-----------------------|------------------|-------|--------------------|-------|------------------|---------------|
| <b>Age</b>            | N                | %     | N                  | %     |                  |               |
| 50-60                 | 52               | 44.07 | 99                 | 54.7  |                  |               |
| 60-70                 | 39               | 33.05 | 49                 | 27.07 |                  |               |
| 70+                   | 27               | 22.88 | 33                 | 18.23 | 3.23             | 0.2           |
| Mean (SD)             | 62.338(8.8087)   |       | 60.635(8.0505)     |       |                  |               |
| <b>Gender</b>         |                  |       |                    |       |                  |               |
| Male                  | 44               | 37.29 | 84                 | 46.41 |                  |               |
| Female                | 74               | 62.71 | 97                 | 53.59 | 2.07             | 0.15          |
| <b>Education</b>      |                  |       |                    |       |                  |               |
| No education          | 29               | 24.58 | 19                 | 10.5  |                  |               |
| Basic/intermediate    | 52               | 44.07 | 63                 | 34.81 |                  |               |
| University            | 37               | 31.36 | 99                 | 54.7  | 18.968           | <b>0.0001</b> |
| <b>Marital Status</b> |                  |       |                    |       |                  |               |
| Single                | 1                | 0.85  | 4                  | 2.21  |                  |               |
| Married               | 69               | 58.47 | 121                | 66.85 |                  |               |
| Separated             | 3                | 2.54  | 0                  | 0     |                  |               |
| Divorced              | 3                | 2.54  | 10                 | 5.52  |                  |               |



|       |    |       |    |       |        |               |
|-------|----|-------|----|-------|--------|---------------|
| Widow | 42 | 35.59 | 46 | 25.41 | 10.159 | <b>0.0378</b> |
|-------|----|-------|----|-------|--------|---------------|

170

171

172

### 173 **Dependent variable**

174 Cognitive performance was assessed using a composite measure based on three tests: immediate recall,  
175 delayed recall, and verbal fluency. The immediate and delayed recall tasks evaluated short-term verbal  
176 learning and memory. Verbal fluency measured executive function and language ability. The composite  
177 score ranged from 0 to 1, where 0 to 0.5 indicated impairment and 0.5 to 1 indicated unimpaired cognitive  
178 function.

179

### 180 **Covariates and moderators**

181 Cognitive performance in later life is influenced by various factors such as age, education, gender, and  
182 marital status. To account for these variables, they were included as covariates in the analyses. Gender  
183 was represented as a dummy variable with 1 for men and 2 for women. Age was also represented as a  
184 dummy variable with 1 for ages between 50 and 60, 2 for ages between 60 and 70, and 3 for ages over 70.  
185 Similarly, education was represented as a dummy variable with 1 for no education, 2 for basic to  
186 intermediate education, and 3 for university or postgraduate studies.

### 187 **Analyses of data**

188 To begin, descriptive statistics were used to compute The means and standard deviations of continuous  
189 variables, as well as the percentages and frequencies of categorical variables.

190 Bivariate analyses were performed in the second stage to examine the relationship between cognitive  
191 health and the study variables, using independent t-tests for factors.

### 192 **Cognitive performance**

193 The researchers assessed cognitive functioning using three tasks: verbal fluency, immediate word recall,  
194 and delayed word recall. Verbal fluency evaluated executive function by asking participants to name as  
195 many animals as possible in one minute. Memory function was assessed through the Ten-Word Delayed  
196 Recall Test, where participants recalled ten words immediately and after five minutes. These measures

197 allowed researchers to evaluate executive function and memory constructs, differentiating between age-  
 198 related memory changes and significant impairments. The assessment was based on widely-used  
 199 neuropsychological tasks for memory performance evaluation.

200

201

202 **Table 3. Non-communicable diseases and cognitive functions preliminary results**

| <b>Disease Name</b>                                                                  |                                                                                          | <b>Diseases</b>      | <b>No disease</b> | <b>Percentage</b> | <b>Disease</b> | <b>Percentage%</b> |       |
|--------------------------------------------------------------------------------------|------------------------------------------------------------------------------------------|----------------------|-------------------|-------------------|----------------|--------------------|-------|
| <b>Cardiovascular Disease: (Heart disease, hypertension, cholesterol and angina)</b> | Age group                                                                                | 50-60                | 492               | 81.46             | 112            | 18.54              |       |
|                                                                                      |                                                                                          | 60-70                | 244               | 69.32             | 108            | 30.68              |       |
|                                                                                      |                                                                                          | 70 and above         | 150               | 62.50             | 90             | 37.50              |       |
|                                                                                      | Gender                                                                                   | Male                 | 371               | 72.46             | 141            | 27.54              |       |
|                                                                                      |                                                                                          | Female               | 515               | 75.29             | 169            | 24.71              |       |
|                                                                                      | Education                                                                                | No education         | 150               | 78.13             | 42             | 21.88              |       |
|                                                                                      |                                                                                          | Basic/intermediate   | 335               | 72.83             | 125            | 27.17              |       |
|                                                                                      |                                                                                          | University/post grad | 401               | 73.71             | 143            | 26.29              |       |
|                                                                                      | Cognition                                                                                | Unimpaired           | 563               | 77.76             | 161            | 22.24              |       |
|                                                                                      |                                                                                          | Impaired             | 323               | 68.43             | 149            | 31.57              |       |
|                                                                                      | <b>Neuro/psychiatric Disease: (Parkinson's disease, Insomnia, Fall, Fear of Falling,</b> | Age group            | 50-60             | 834               | 92.15          | 71                 | 7.85  |
|                                                                                      |                                                                                          |                      | 60-70             | 463               | 87.69          | 65                 | 12.31 |
| 70 and above                                                                         |                                                                                          |                      | 297               | 82.50             | 63             | 17.50              |       |
| Gender                                                                               |                                                                                          | Male                 | 695               | 90.49             | 73             | 9.51               |       |

|                                      |                                                                      |                      |       |       |       |       |       |
|--------------------------------------|----------------------------------------------------------------------|----------------------|-------|-------|-------|-------|-------|
| <b>Dizziness, Brain Clots)</b>       |                                                                      | Female               | 899   | 87.71 | 126   | 12.29 |       |
|                                      | Education                                                            | No education         | 254   | 88.50 | 33    | 11.50 |       |
|                                      |                                                                      | Basic/intermediate   | 621   | 90.00 | 69    | 10.00 |       |
|                                      |                                                                      | University/post grad | 719   | 88.11 | 97    | 11.89 |       |
|                                      | Cognition                                                            | Unimpaired           | 1002  | 92.35 | 83    | 7.65  |       |
|                                      |                                                                      | Impaired             | 593   | 83.88 | 114   | 16.12 |       |
| <b>Metabolic Disease: (Diabetes)</b> | Age group                                                            | 50-60                | 127   | 84.11 | 24    | 15.89 |       |
|                                      |                                                                      | 60-70                | 55    | 62.50 | 33    | 37.50 |       |
|                                      |                                                                      | 70 and above         | 28    | 46.67 | 32    | 53.33 |       |
|                                      | Gender                                                               | Male                 | 91    | 71.09 | 37    | 28.91 |       |
|                                      |                                                                      | Female               | 119   | 69.59 | 52    | 30.41 |       |
|                                      | Education                                                            | No education         | 34    | 70.83 | 14    | 29.17 |       |
|                                      |                                                                      | Basic/intermediate   | 77    | 66.96 | 38    | 33.04 |       |
|                                      |                                                                      | University/post grad | 99    | 72.79 | 37    | 27.21 |       |
|                                      | Cognition                                                            | Unimpaired           | 137   | 75.69 | 44    | 24.31 |       |
|                                      |                                                                      | Impaired             | 73    | 61.86 | 45    | 38.14 |       |
|                                      | <b>Abdominal and Gastrointestinal Disease: (Stomach Ulcer, Urine</b> | Age group            | 50-60 | 407   | 89.85 | 46    | 10.15 |
|                                      |                                                                      |                      | 60-70 | 215   | 81.44 | 49    | 18.56 |
| 70 and above                         |                                                                      |                      | 148   | 82.22 | 32    | 17.78 |       |
| Gender                               |                                                                      | Male                 | 339   | 88.28 | 45    | 11.72 |       |

|                                                                     |               |                      |       |       |       |       |      |
|---------------------------------------------------------------------|---------------|----------------------|-------|-------|-------|-------|------|
| <b>Incontinence, Bowel Problems)</b>                                |               | Female               | 431   | 84.02 | 82    | 15.98 |      |
|                                                                     | Education     | No education         | 127   | 88.19 | 17    | 11.81 |      |
|                                                                     |               | Basic/intermediate   | 308   | 89.28 | 37    | 10.72 |      |
|                                                                     |               | University/post grad | 335   | 82.11 | 73    | 17.89 |      |
|                                                                     | Cognition     | Unimpaired           | 463   | 85.27 | 80    | 14.73 |      |
|                                                                     |               | Impaired             | 307   | 86.72 | 47    | 13.28 |      |
| <b>Chest Disease: (Asthma, Lung Disease, Hard Breathing, Cough)</b> | Age group     | 50-60                | 565   | 93.54 | 39    | 6.46  |      |
|                                                                     |               | 60-70                | 314   | 89.20 | 38    | 10.80 |      |
|                                                                     |               | 70 and above         | 222   | 92.50 | 18    | 7.50  |      |
|                                                                     | Gender        | Male                 | 467   | 91.21 | 45    | 8.79  |      |
|                                                                     |               | Female               | 634   | 92.69 | 50    | 7.31  |      |
|                                                                     | Education     | No education         | 185   | 96.35 | 7     | 3.65  |      |
|                                                                     |               | Basic/intermediate   | 428   | 93.04 | 32    | 6.96  |      |
|                                                                     |               | University/post grad | 488   | 89.71 | 56    | 10.29 |      |
|                                                                     | Cognition     | Unimpaired           | 689   | 95.17 | 35    | 4.83  |      |
|                                                                     |               | Impaired             | 412   | 87.29 | 60    | 12.71 |      |
|                                                                     | <b>Cancer</b> | Age group            | 50-60 | 149   | 98.68 | 2     | 1.32 |
|                                                                     |               |                      | 60-70 | 85    | 96.59 | 3     | 3.41 |
| 70 and above                                                        |               |                      | 58    | 96.67 | 2     | 3.33  |      |
| Gender                                                              |               | Male                 | 124   | 96.88 | 4     | 3.13  |      |

|                                                                                          |           |                      |     |       |     |       |
|------------------------------------------------------------------------------------------|-----------|----------------------|-----|-------|-----|-------|
|                                                                                          |           | Female               | 168 | 98.25 | 3   | 1.75  |
|                                                                                          | Education | No education         | 47  | 97.92 | 1   | 2.08  |
|                                                                                          |           | Basic/intermediate   | 113 | 98.26 | 2   | 1.74  |
|                                                                                          |           | University/post grad | 132 | 97.06 | 4   | 2.94  |
|                                                                                          | Cognition | Unimpaired           | 176 | 97.24 | 5   | 2.76  |
|                                                                                          |           | Impaired             | 116 | 98.31 | 2   | 1.69  |
| <b>Musculoskeletal Disease: (Osteoporosis, Arthritis, Hip Fracture, Back/Joint Pain)</b> | Age group | 50-60                | 480 | 79.47 | 124 | 20.53 |
|                                                                                          |           | 60-70                | 260 | 76.25 | 81  | 23.75 |
|                                                                                          |           | 70 and above         | 161 | 67.08 | 79  | 32.92 |
|                                                                                          | Gender    | Male                 | 427 | 83.40 | 85  | 16.60 |
|                                                                                          |           | Female               | 474 | 69.40 | 209 | 30.60 |
|                                                                                          | Education | No education         | 131 | 68.23 | 61  | 31.77 |
|                                                                                          |           | Basic/intermediate   | 365 | 79.52 | 94  | 20.48 |
|                                                                                          |           | University/post grad | 405 | 74.45 | 139 | 25.55 |
|                                                                                          | Cognition | Unimpaired           | 554 | 76.52 | 170 | 23.48 |
|                                                                                          |           | Impaired             | 347 | 73.67 | 124 | 26.33 |

203

#### 204 **Prevalence of Noncommunicable Diseases (NCDs)**

205 Our study focuses on cardiovascular, abdominal, chest, neuro/psychiatric, metabolic, and musculoskeletal  
 206 diseases and cancer's impact on cognitive impairment presented in Table 3.. The prevalence of these  
 207 diseases varies across age groups and genders, reflecting the intricate web of interactions shaping Egypt's  
 208 aging population.

## 209 **Neuro/Psychiatric Diseases and Cognitive Well-being**

210 Cognitive impairment reveals the interconnectedness of mental well-being and cognitive faculties.  
211 Conditions like insomnia show statistically significant associations with cognitive impairment (p-value:  
212 0.0169). The intricate interplay between cognitive well-being and mental health becomes evident when  
213 exploring associations between neuro/psychiatric diseases and cognitive impairment.

214

## 215 **Metabolic Diseases and Their Impact on Cognition**

216 Metabolic diseases, epitomized by diabetes, demonstrate their nuanced relationship with cognitive health  
217 through statistically significant associations with cognitive impairment (p-value: 0.0137). These findings  
218 accentuate the urgency of interventions that holistically address metabolic and cognitive well-being,  
219 thereby potentially ameliorating the progression of cognitive decline.

220

## 221 **Respiratory Health and Cognitive Implications**

222 Associations between chest diseases and cognitive impairment underline the intricate connection between  
223 respiratory health and cognitive well-being. Conditions like hard breathing and cough show statistically  
224 significant associations with cognitive impairment (p-values: 0.000076, 0.0032). The intricate correlation  
225 between respiratory health and cognitive well-being materializes in associations between chest diseases  
226 and cognitive impairment.

227

## 228 **Musculoskeletal Health and Functional Independence**

229 The intricate dance between physical well-being and cognitive health manifests as associations between  
230 musculoskeletal diseases and cognitive impairment. Ailments like falls, fear of falls, and dizziness, often  
231 rooted in musculoskeletal health, demonstrate statistically significant associations with cognitive  
232 impairment, underscoring the profound interaction between the physical and cognitive domains (p-values:  
233 0.00108, 0.001089, 0.0089).

234

## 235 **Cancer and Its Nuanced Prevalence**

236 Cancer prevalence in the older Egyptian population was notably low. Specifically, among those aged 50-  
237 60 years, only 1.32% had cancer, with 98.68% without the disease. In the 60-70 age group, 3.41% were

238 affected by cancer, while 96.59% were not. Similarly, among individuals aged 70 and above, cancer was  
239 found in 3.33%, with 96.67% unaffected. However, Larger and more diverse samples are needed to draw  
240 more definitive conclusions about cancer rates in the Egyptian older population. Acknowledging these  
241 limitations is essential for a balanced perspective on the findings, and further research is required for  
242 more accurate insights into the cancer burden among the older population in Egypt.

243

## 244 **Discussion**

### 245 **Implications for Egypt's Aging Population**

246 Findings hold significance for Egypt's aging demographic, informing policies and interventions that cater  
247 to older adults' unique needs. The implications of these findings extend far beyond statistical associations.  
248 They reverberate through policy decisions, healthcare interventions, and societal strategies that  
249 acknowledge the diverse needs and challenges faced by Egypt's aging demographic. These implications  
250 underscore the imperatives of tailored interventions that holistically address the intricate interplay  
251 between physical and cognitive well-being.

252 The policy implications derived from the AL-SEHA pilot study data present a comprehensive framework  
253 for the development of effective strategies aimed at addressing noncommunicable diseases (NCDs) and  
254 cognitive health concerns within Egypt's elderly population. To address these issues, it is imperative to  
255 craft and implement targeted programs with a strong focus on the prevention and management of NCDs,  
256 with particular attention to the promotion of cognitive health and overall well-being. Additionally, the  
257 evaluation of the necessity for disease prevention initiatives, including adult vaccination campaigns,  
258 awareness programs addressing tobacco use, and initiatives that encourage physical activity among older  
259 adults, is crucial. Furthermore, enhancing the geriatric care landscape in Egypt is essential, involving the  
260 incorporation of specialized care pathways that cater to the unique needs of the elderly. This also  
261 necessitates a revision of the medical education curriculum to include geriatric medicine, emphasizing the  
262 diagnosis, treatment, and management of multiple coexisting health conditions prevalent in the aging  
263 population. Expanding the capacity and accessibility of geriatric care facilities is vital to ensure  
264 comprehensive and effective support for older individuals. Furthermore, the integration of geriatric  
265 healthcare services across primary, secondary, and tertiary healthcare systems, including community-  
266 based health initiatives, is essential to provide holistic care. Cross-regional analyses should be conducted  
267 to identify best practices in areas such as long-term care, home-based support, legal protections, and  
268 healthcare expenditure, customized to the specific context of Egypt. Additionally, the formulation of  
269 national strategies for dementia prevention, targeting both the general population and vulnerable

270 subgroups, is paramount. This should be complemented by the establishment of governmental initiatives  
271 at both national and local levels to effectively address the multifaceted challenges of dementia care and  
272 provide support for patients and caregivers in Egypt. These policy recommendations collectively form a  
273 robust foundation for addressing the pressing healthcare needs of Egypt's elderly population in the context  
274 of NCDs and cognitive health.

275

### 276 **Healthcare Planning and Resource Allocation**

277 Understanding associations between cognitive impairment and diseases aids in strategic resource  
278 allocation for timely interventions. The recognition of associations between cognitive impairment and  
279 diverse diseases augments the strategic blueprint for resource allocation within the Egyptian healthcare  
280 system. Informed by these associations, policymakers can channel resources towards timely interventions  
281 that ameliorate cognitive decline, enhancing not only individual well-being but also alleviating societal  
282 burdens.

283

### 284 **Catalyzing Research and Collaboration**

285 Associations between cognitive impairment and diseases foster interdisciplinary research and  
286 collaboration for holistic strategies. The implications of cognitive impairment's associations with diseases  
287 extend beyond individual interventions, catalyzing collaborative research across disciplines in Egypt and  
288 the MENA region. This interdisciplinary endeavor propels the creation of comprehensive strategies that  
289 transcend traditional healthcare silos, forging innovative pathways to address the intricate web of  
290 cognitive decline.

291

### 292 **Conclusion: Enabling a Brighter Aging Future for Egypt**

293 Evidence-based policies and interventions pave the way for a healthier and more inclusive aging  
294 demographic. In conclusion, the synthesis of evidence-based policies and interventions emerges as the  
295 cornerstone of facilitating a brighter, healthier aging trajectory for Egypt. The intricate interplay between  
296 cognitive impairment and noncommunicable diseases unravels novel avenues for policymaking and  
297 interventions, steering the nation toward a future that prioritizes the well-being and dignity of its aging  
298 population.

299



## 300 **Limitations of the Study and Suggestions for Future Research in the Egyptian Context**

301 Acknowledging limitations, future research can employ longitudinal designs and objective measures to  
302 enhance understanding. Admitting the inherent limitations of this study, future research endeavors within  
303 the Egyptian context can harness the power of longitudinal designs and objective measurements. These  
304 methodological refinements promise to illuminate deeper insights into the dynamic interplay between  
305 cognitive impairment and diseases, thereby enriching the foundation for comprehensive interventions.

306 In conclusion, this paper delved into the intricate web connecting cognitive impairment and  
307 noncommunicable diseases within Egypt's aging population. By investigating associations between  
308 cognitive decline and diverse diseases, we illuminated a tapestry of interactions that transcend traditional  
309 healthcare boundaries. The implications of these findings resonate through evidence-based policies,  
310 cultural considerations, interdisciplinary collaboration, and most importantly, empowered aging  
311 experiences. These insights paves the way for Egypt towards a future characterized by enhanced well-  
312 being, dignity, and inclusivity for its elderly citizens.

313

314

315 **Correspondence to: Sara A. Moustafa**

316 **Full name: Sara Ayman Moustafa**

317 **Mailing address: The American University in Cairo**

318 **Email: saraayman@Aucegypt.edu**

319

## 320 **Acknowledgment**

321

322 The present work has been supported by the German Academic Exchange Services (DAAD), through the  
323 funding program: Higher Education Dialogue with the Muslim World, project (Ageing in the East  
324 Mediterranean Region: EMage). This work benefitted from an incentive grant from the World Health  
325 Organization (WHO) as part of the WHO Global Noncommunicable Disease (NCD) Platform Young  
326 Researchers Programme (Grant reg. № 2022/1256080).

327 The authors want to thank Dr. Tea Collins and Ms. Daria Berlina for their support and feedback on the  
328 final draft.

329

### 330 **Patient involvement**

331 No patients were involved.

332

### 333 **Conflicts of Interest**

334 We have no interests to declare.

335

336

337

### 338 **References**

- 339 1. Chen X, Smith J, Strauss J, Wang Y, Zhao Y. China Health and Retirement Longitudinal Study  
340 (CHARLS). In: Pachana N, eds. Encyclopedia of Geropsychology. Springer; 2015.  
341 [https://doi.org/10.1007/978-981-287-080-3\\_42-1](https://doi.org/10.1007/978-981-287-080-3_42-1)
- 342 2. Cesari M, Araujo de Carvalho I, Amuthavalli Thiyagarajan J, et al. Evidence for the Domains  
343 Supporting the Construct of Intrinsic Capacity. *J Gerontol A Biol Sci Med Sci*.  
344 2018;73(12):1653-1660. doi:10.1093/gerona/gly011
- 345 3. Beard JR, Si Y, Liu Z, Chenoweth L, Hanewald K. Intrinsic Capacity: Validation of a New WHO  
346 Concept for Healthy Aging in a Longitudinal Chinese Study. *J Gerontol A Biol Sci Med Sci*.  
347 2022;77(1):94-100. doi:10.1093/gerona/glab226
- 348 4. Sharma D, Mazta S, Parashar A. Prevalence of cognitive impairment and related factors among  
349 the elderly: a population-based study. *J Dr. NTR Univ. Heal. Sci*. 2013;2:171.  
350 <https://doi.org/10.4103/2277-8632.117182>
- 351 5. Grover S, Nehra R, Malhotra R, Kate N. Positive aspects of caregiving experience among  
352 caregivers of patients with dementia. *East Asian Arch. Psychiatry*. 2017;27:71-78.
- 353 6. Patel R, Singh U. Prevalence study of cognitive impairment and its associated sociodemographic  
354 variables using mini-mental status examination among elderly population residing in field

- 355 practice areas of a medical college. *Indian J. Community Med.* 2018;43:113-116.  
356 [https://doi.org/10.4103/ijcm.IJCM\\_102\\_17](https://doi.org/10.4103/ijcm.IJCM_102_17)
- 357 7. Abdel-Hady D, El-Gilany A-H. Tobacco use and its associated factors among older people: a  
358 community-based study in Egypt. *East Mediterr Health J.* 2020;26(1):68–74.  
359 <https://doi.org/10.26719/2020.26.1.68>
- 360 8. Egyptian Environmental Affairs Agency (EEAA). Egypt second national communication under  
361 the united nations framework convention on climate change. Cairo: Egyptian Environmental  
362 Affairs Agency (EEAA); 2010
- 363 9. El-Sherbiny NA, Younis A, Masoud M. A comprehensive assessment of the physical, nutritional,  
364 and psychological health status of the elderly populace in the Fayoum Governorate (Egypt). *Arch*  
365 *Gerontol Geriatr.* 2016;66:119-126. doi:10.1016/j.archger.2016.05.004
- 366 10. Okasha A. History of mental health in the Arab world. In: Okasha A, Maj M, eds. *Images in*  
367 *Psychiatry: An Arab Perspective.* World Psychiatric Association; 2001:1-20.
- 368 11. Endrawes G, O'Brien L, Wilkes L. Mental illness and Egyptian families. *Int J Ment Health Nurs.*  
369 2007;16:178-187. doi:10.1111/j.1447-0349.2007.00456.x
- 370 12. Aly HY, Hamed AF, Mohammed NA. Depression among the elderly population in Sohag  
371 governorate. *Saudi Med J.* 2018;39(2):185–190. <https://doi.org/10.15537/smj.2018.2.21353>
- 372 13. Alsayyad E, et al. Gender difference in health issues and cognitive functions among an Egyptian  
373 normal elderly population. *Egypt J Neuropsychiatr Neurosurg.* 2020;56(1). Available at:  
374 <https://doi.org/10.1186/s41983-020-0146-z>
- 375 14. Odejimi O, Tadros G, Sabry N. A systematic review of the prevalence of mental and  
376 neurocognitive disorders amongst older adults' populace in Egypt. *Middle East Curr Psychiatry.*  
377 2020;27:47. <https://doi.org/10.1186/s43045-020-00055-8>
- 378 15. Hughes JC. Whole sight: clinical and research priorities in old age psychiatry. *Lancet Psychiatry.*  
379 2017;4(2):94-95. doi:10.1016/S2215-0366(16)30353-4
- 380 16. Youssef W. Application of total scores of CERAD neuropsychological battery in detecting MCI  
381 and dementia in a sample of Egyptian elderly. *J Posit School Psychol.* 2022;6(2):1535–1544.
- 382 17. Börsch-Supan A, Hank K, Jürges H. A new comprehensive and international view on ageing:  
383 Introducing the 'Survey of Health, Ageing and Retirement in Europe'. *Eur J Ageing.* 2005;2:245-  
384 253. doi:10.1007/s10433-005-0014-9
- 385 18. Cheke LG, Clayton NS. Do different tests of episodic memory produce consistent results in  
386 human adults? *Learn Mem.* 2013;20(9):491-498. doi:10.1101/lm.030502.113
